# Supplementary material
Source: Royal Society of Chemistry journal article supplement (doi:10.1039/d6nj01166g)
Supplement: d6nj01166g1.pdf [file d6nj01166g1.pdf]

*Supporting Information for*

**Heparin-Covalently Grafted Graphene Oxide Hybrid-Modified Polyethersulfone Membranes for Enhanced Toxin Clearance and Hemocompatibility in Hemodialysis**

Xianya Wu, Zhijiang Sun, Yanfeng Wei, Mohammed Kamal Hadi, Yumeng Wang, Xiangya Wang, Fen Ran\*

*Energy Storage Institute, State Key Laboratory of Advanced Processing and Recycling of Non-ferrous Metals, School of Materials Science and Engineering, School of Green Energy and Storage, Gansu Interdisciplinary Center for Energy Storage Materials and Systems, Lanzhou University of Technology, Lanzhou 730050, China*

\*Corresponding Author: Dr. Prof. Fen Ran ([ranfen@lut.edu.cn](mailto:ranfen@lut.edu.cn)).

**Table S1.** The casting solution composition for different membranes.

| Samples | PES<br>(g) | PVP<br>(g) | GO<br>(g) | GH<br>(g) | DMAc<br>(mL) |
|---------|------------|------------|-----------|-----------|--------------|
| PES     | 1.6        | 0.1        | 0         | 0         | 8.4          |
| PES/GO  | 1.6        | 0.1        | 0.1       | 0         | 8.4          |
| PES/GH  | 1.6        | 0.1        | 0         | 0.1       | 8.4          |

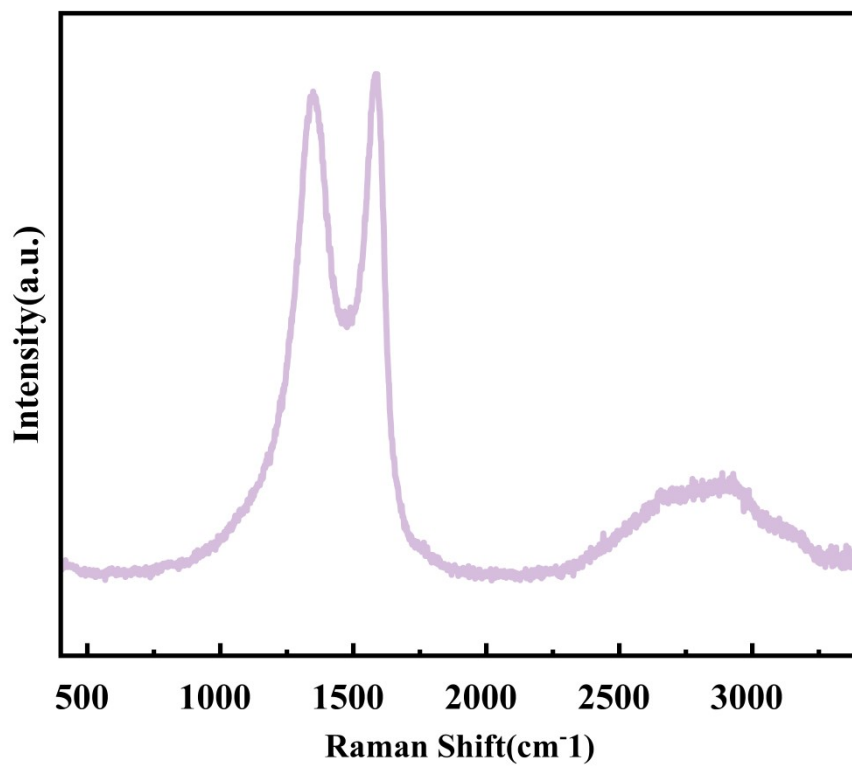

*Figure S1. Raman spectra of the pristine GO powder.*

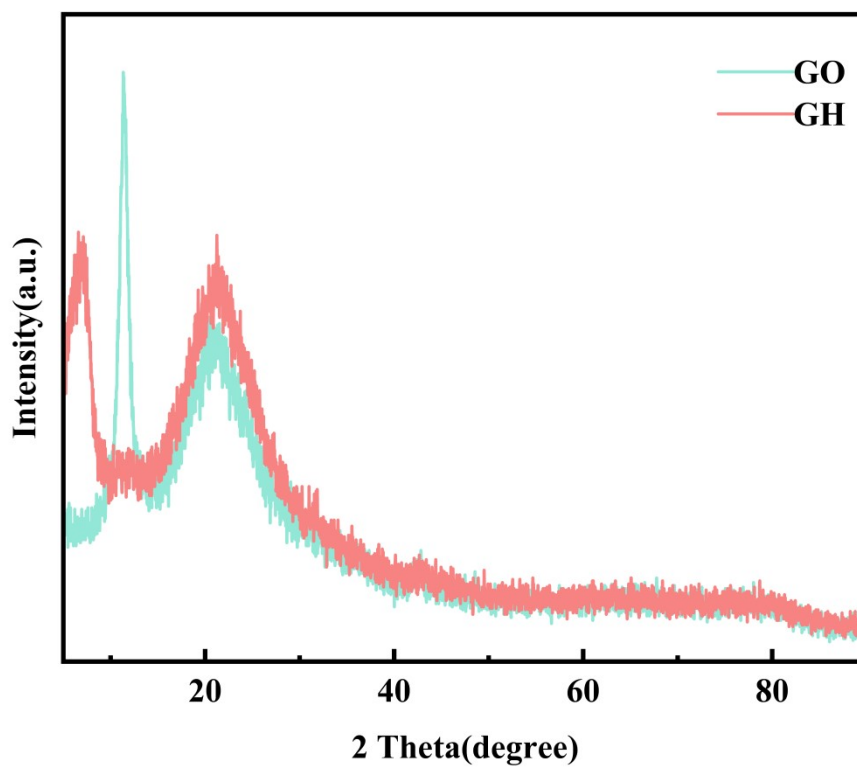

*Figure S2. XRD spectra of GO and GH.*

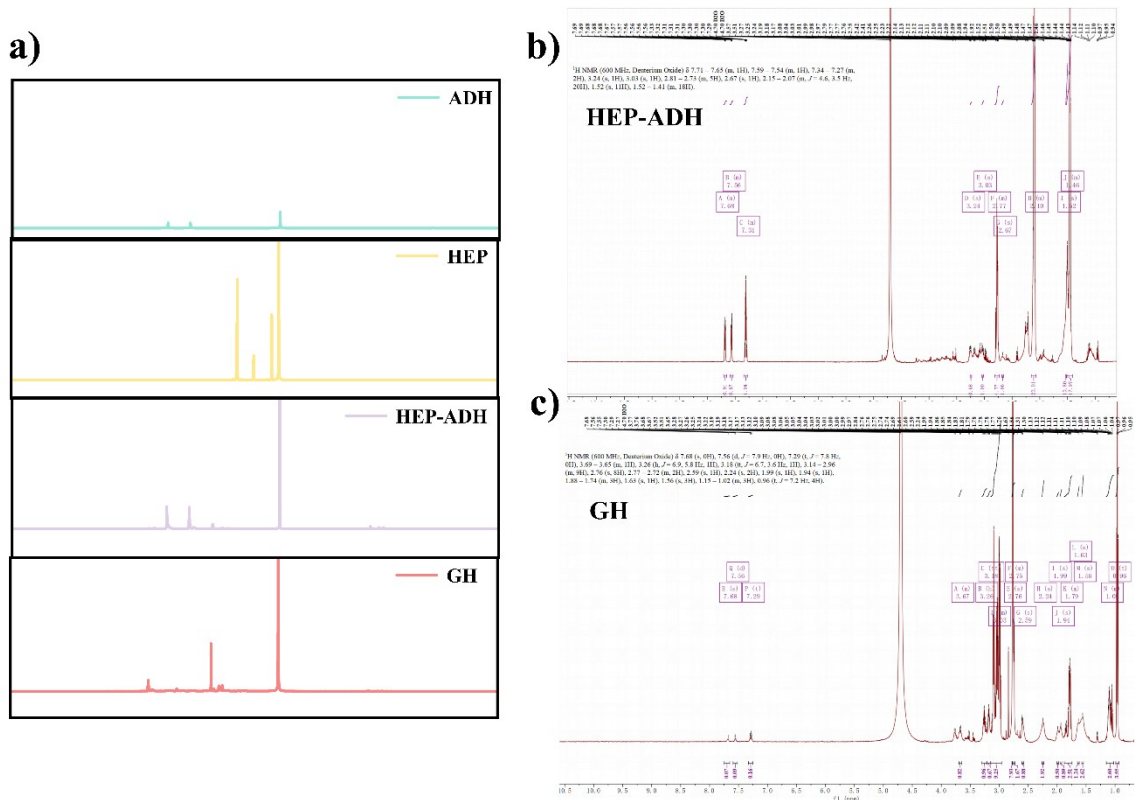

**Figure S3.** a)  $^1\text{H}$  NMR spectra of ADH, HEP, HEP-ADH, and the synthesized GH hybrid. (600 MHz,  $\text{D}_2\text{O}$ ) b)  $^1\text{H}$  NMR spectra of HEP-ADH.  $^1\text{H}$  NMR (600 MHz, Deuterium Oxide)  $\delta$  7.71 – 7.65 (m, 1H), 7.59 – 7.54 (m, 1H), 7.34 – 7.27 (m, 2H), 3.24 (s, 1H), 3.03 (s, 1H), 2.81 – 2.73 (m, 5H), 2.67 (s, 1H), 2.15 – 2.07 (m,  $J = 4.6, 3.5$  Hz, 20H), 1.52 (s, 11H), 1.52 – 1.41 (m, 18H). c)  $^1\text{H}$  NMR spectra of GH.  $^1\text{H}$  NMR (600 MHz, Deuterium Oxide)  $\delta$  7.68 (s, 0H), 7.56 (d,  $J = 7.9$  Hz, 0H), 7.29 (t,  $J = 7.8$  Hz, 0H), 3.69 – 3.65 (m, 1H), 3.26 (h,  $J = 6.9, 5.8$  Hz, 1H), 3.18 (tt,  $J = 6.7, 3.6$  Hz, 1H), 3.14 – 2.96 (m, 9H), 2.76 (s, 8H), 2.77 – 2.72 (m, 2H), 2.59 (s, 1H), 2.24 (s, 2H), 1.99 (s, 1H), 1.94 (s, 1H), 1.88 – 1.74 (m, 3H), 1.63 (s, 1H), 1.56 (s, 3H), 1.15 – 1.02 (m, 3H), 0.96 (t,  $J = 7.2$  Hz, 4H).

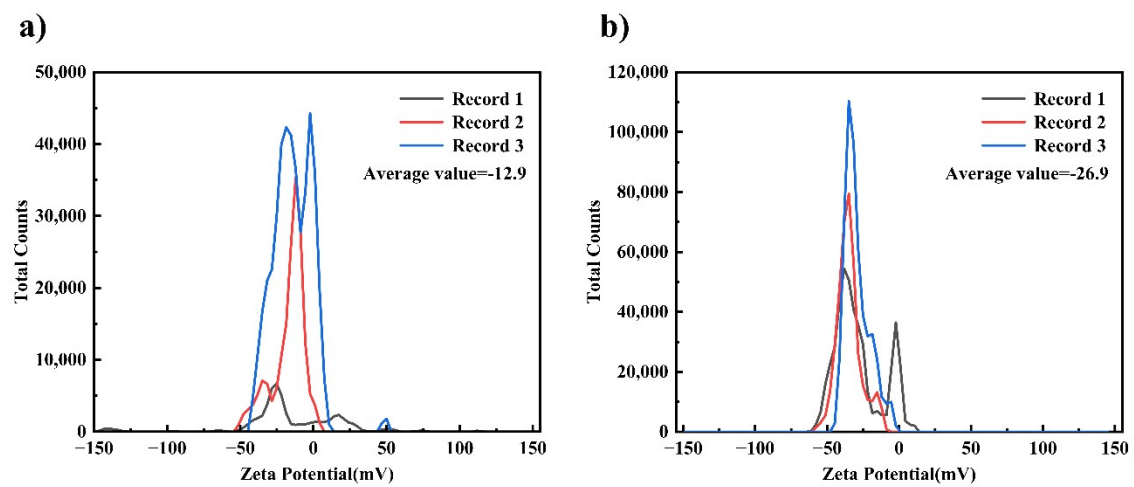

*Figure S4. Zeta potential values of a) GO and b) GH.*

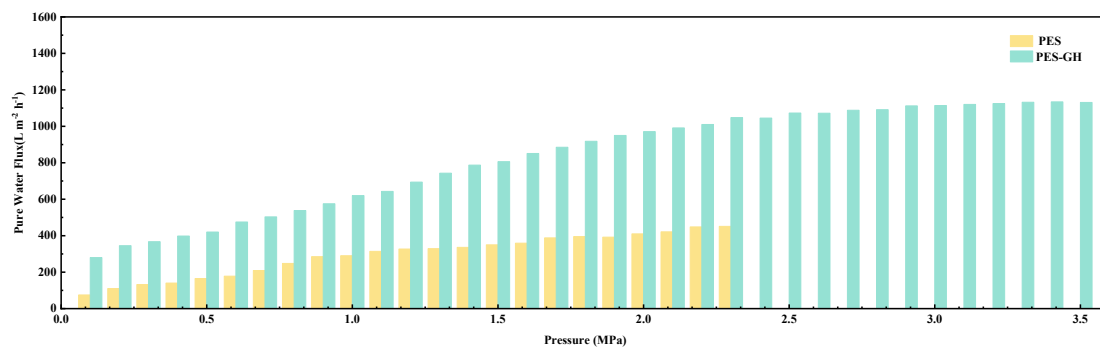

**Figure S5.** Ultimate pressure resistance testing results for the pristine PES, PES-GO, and PES-GH composite membranes.

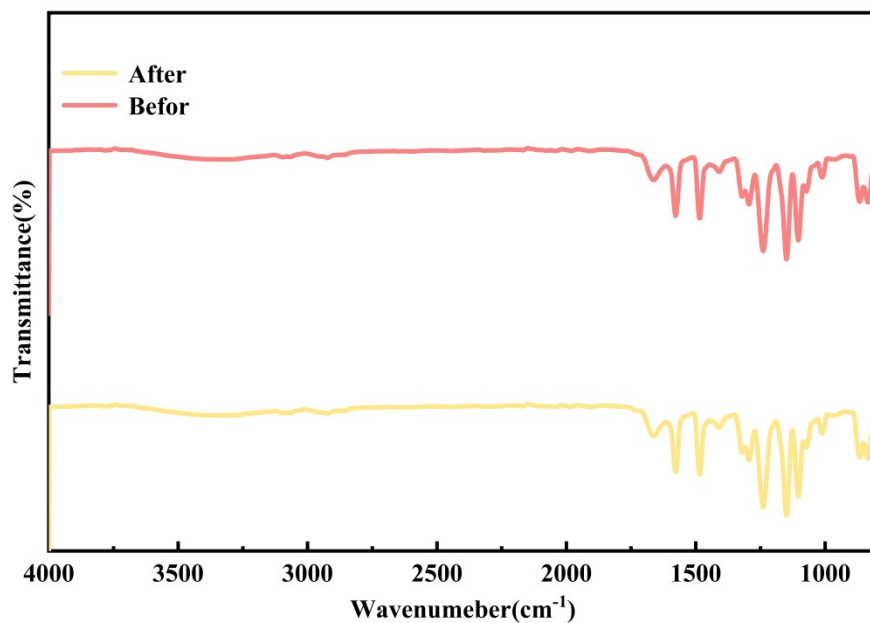

**Figure S6.** ATR-FTIR spectra of the PES-GH membrane before and after the simulated reuse cleaning protocol (using a clinical-grade disinfectant). The consistent characteristic peaks confirm the chemical stability and retention of the covalently grafted GH hybrid on the membrane surface.

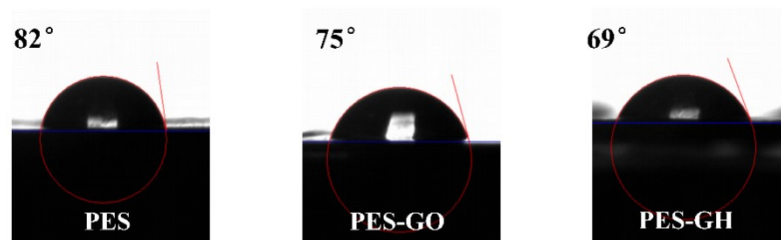

*Figure S7. Images of water contact angle with different membranes.*

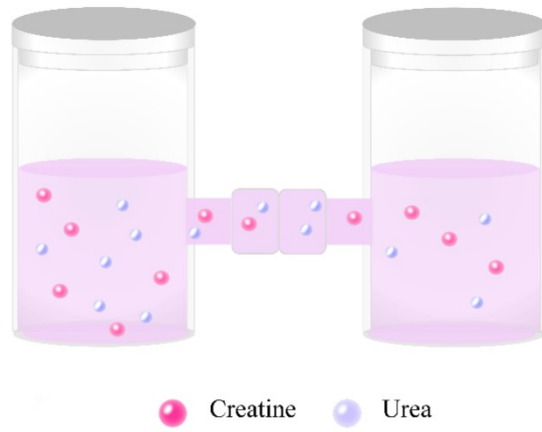

**Figure S8.** *Permeability dialysis experiment setup for clearance measurement of urea and creatine.*

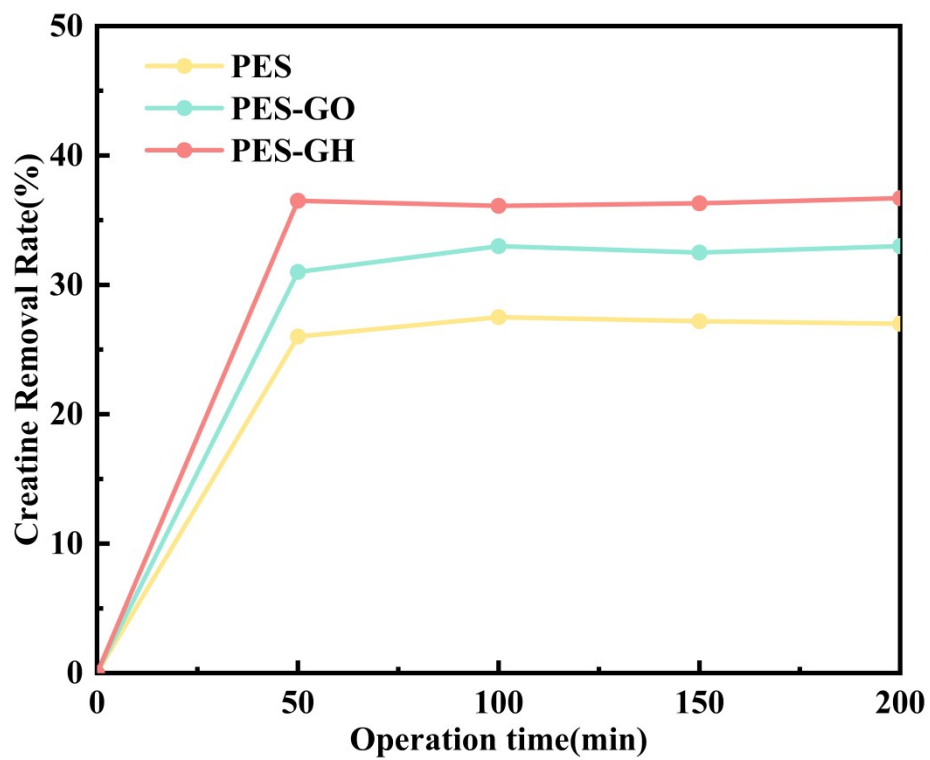

Figure S9. The urea removal rate of different membranes.

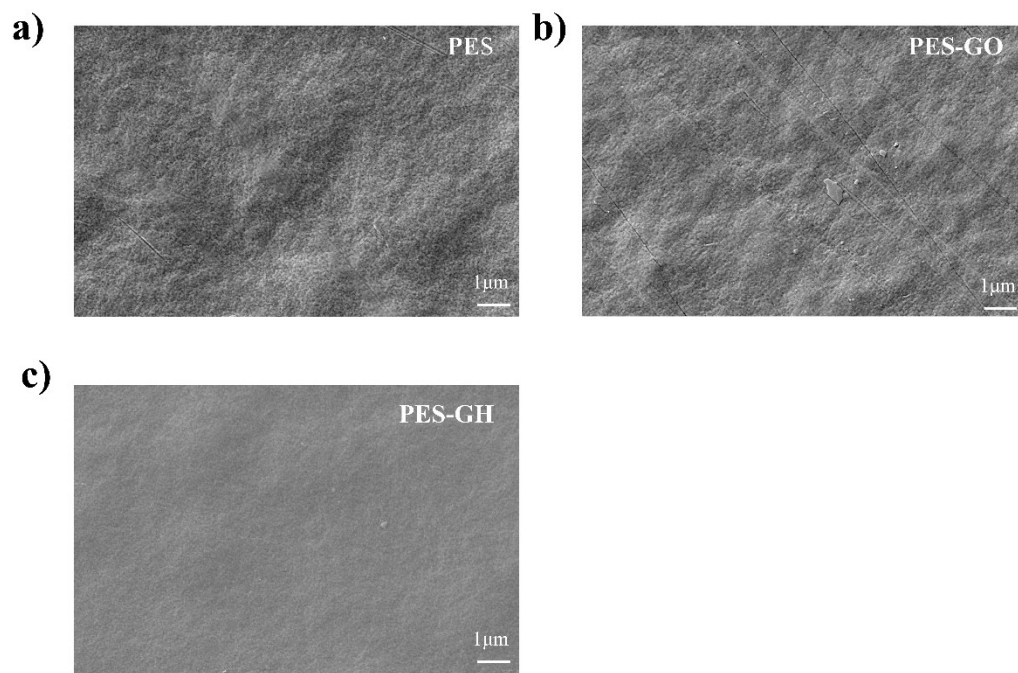

**Figure S10.** The SEM images of PES, PES-GO and PES-GH membranes.

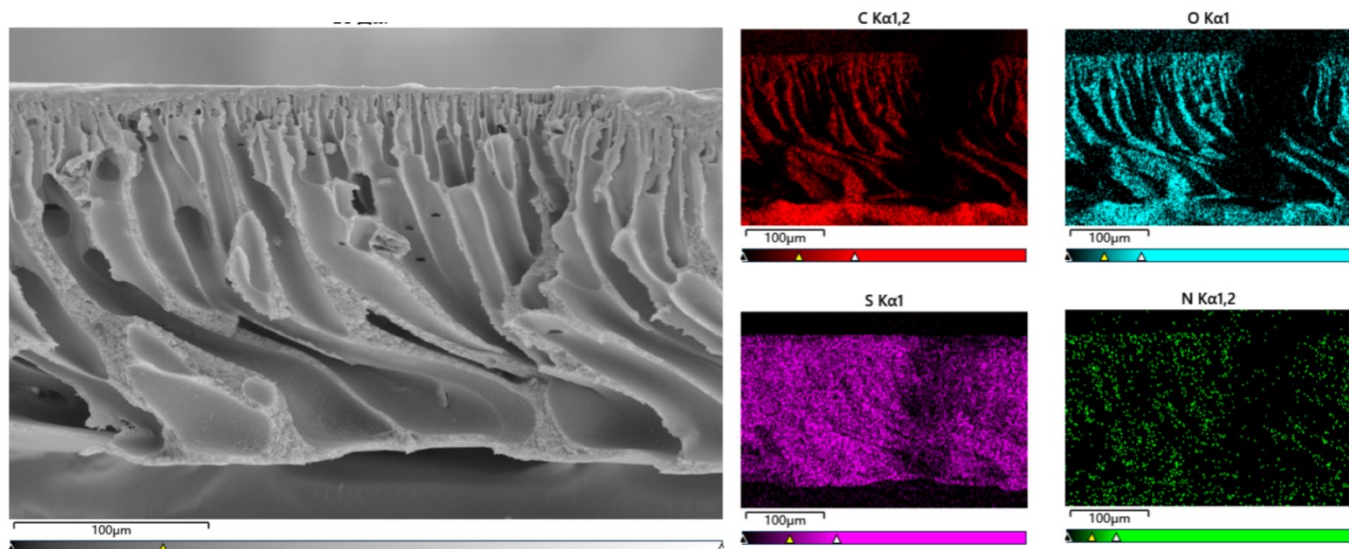

*Figure S11. Mapping images of cross-sectional views of PES-GH.*

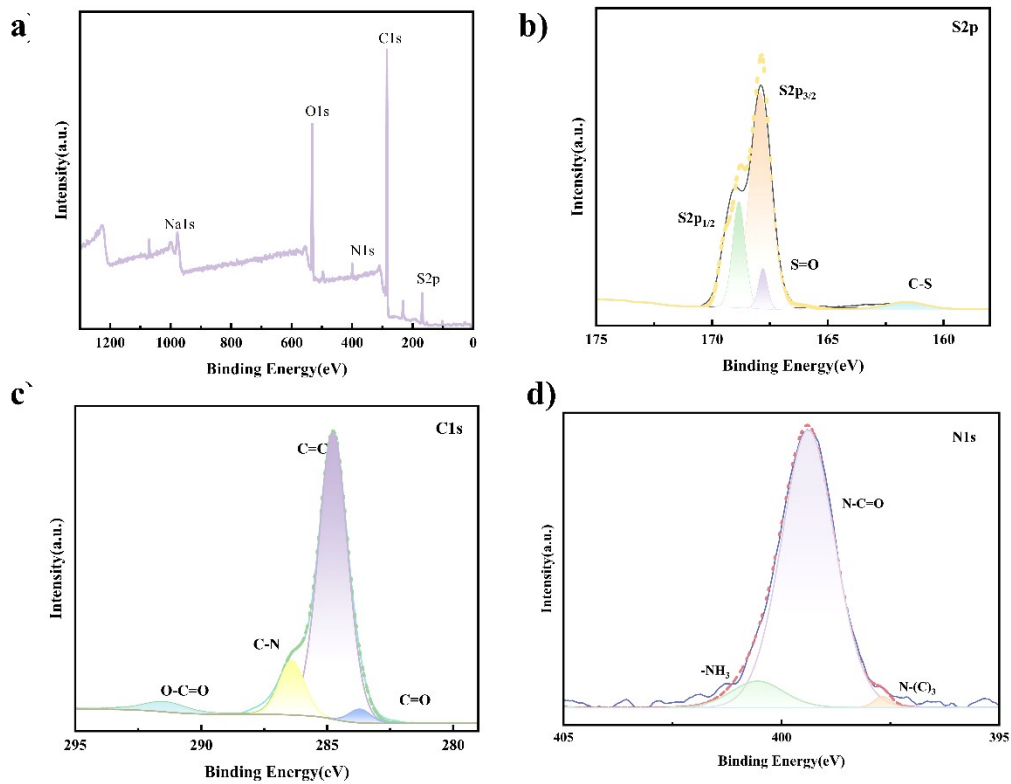

**Figure S12.** XPS spectra of the GH hybrid membrane: (a) S 2p region showing characteristic peaks of sulfonic acid groups (~167–169 eV); (b) C 1s region showing amide linkages (~286–287 eV). These spectra confirm the successful covalent integration of heparin onto the GO framework.
